# Supplementary material for: Electrospun Fibers of Biocompatible and Biodegradable Polyesters, Poly(Ethylene Oxide) and Beeswax with Anti-Bacterial and Anti-Fungal Activities
Source: MDPI journal article supplement (doi:10.3390/ma16134882), 2023-07-07
Supplement: s1 [file s1]

**Supplementary Materials**  
**Electrospun Fibers of Biocompatible and Biodegradable**  
**Polyesters, Poly(Ethylene Oxide) and Beeswax with**  
**Anti-Bacterial and Anti-Fungal Activities**

Selin Kyuchyuk, Dilyana Paneva,\* Nevena Manolova, Iliya Rashkov,\* Daniela Karashanova,  
Mladen Naydenov, Nadya Markova

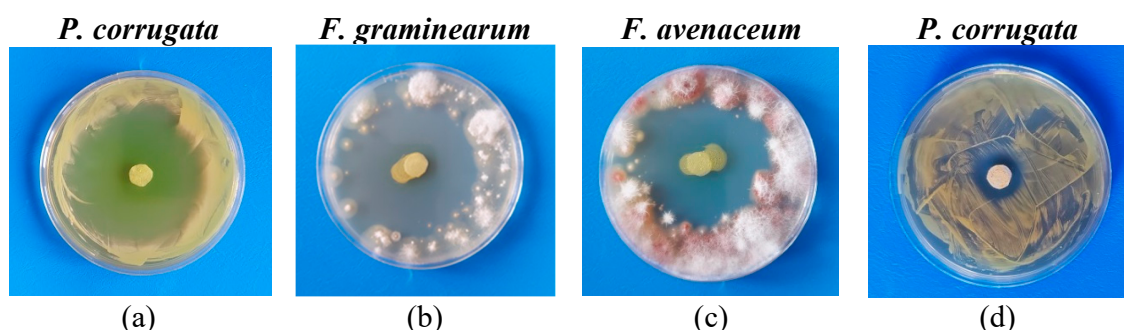

**Figure S1.** Digital images of the inhibition zones registered after contact of filter paper disks loaded with NQ (a-c) or CQ (d) with *P. corrugata* (a, d), *F. graminearum* (b), and *F. avenaceum* (c). NQ or CQ content: 280 µg/disk.

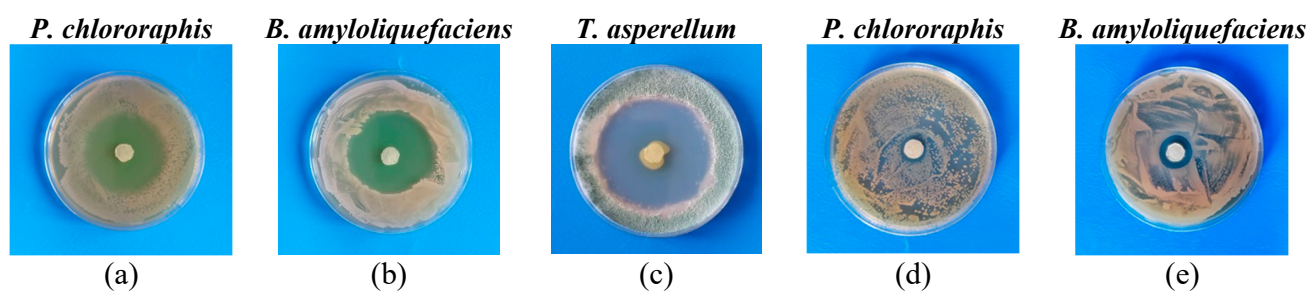

**Figure S2.** Digital images of the inhibition zones registered after contact of filter paper disks loaded with NQ (a-c) or CQ (d, e) with *P. chlororaphis*, *B. amyloliquefaciens*, and *T. asperellum*. NQ or CQ content: 280 µg/disk.
